# Supplementary material
Source: MDPI journal article supplement (https://www.mdpi.com/2071-1050/15/21/15559)
Supplement: s1 [file s1]

---

Number of pages: 2  
Number of figures: 1  
Number of tables: 2

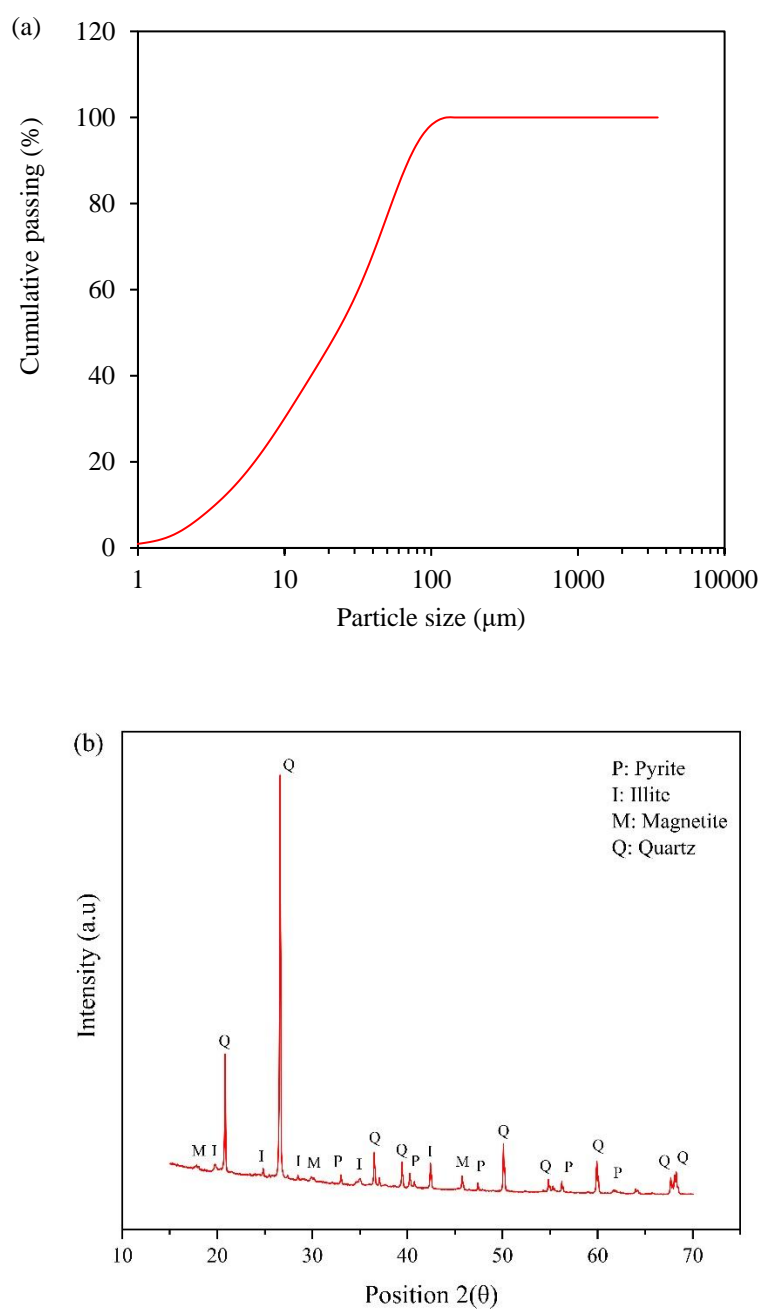

**Figure S1.** (a) particle size distribution and (b) XRD pattern of the gold-bearing sulfidic ore used in bio-oxidation experiments.

---

**Table S1.** D-optimal RSM test matrix for parameter optimization for bio-oxidation assisted by *P. chrysosporium*.

| Run | A: Glucose (g/L) | B: Malt extract (g/L) | C: Yeast extract (g/L) | D: MgSO <sub>4</sub> ·7H <sub>2</sub> O (g/L) |
|-----|------------------|-----------------------|------------------------|-----------------------------------------------|
| 1   | 20               | 0                     | 0.31                   | 0.5                                           |
| 2   | 14.82            | 3.5                   | 1.58                   | 0.5                                           |
| 3   | 13.49            | 2.19                  | 1.52                   | 0.17                                          |
| 4   | 16.11            | 1.36                  | 0                      | 0.3                                           |
| 5   | 20               | 3.5                   | 0                      | 0.5                                           |
| 6   | 20               | 0                     | 0                      | 0                                             |
| 7   | 15.15            | 0                     | 2.5                    | 0                                             |
| 8   | 10               | 3.5                   | 0                      | 0.41                                          |
| 9   | 10               | 3.5                   | 0                      | 0.41                                          |
| 10  | 10               | 0                     | 0                      | 0.5                                           |
| 11  | 14.82            | 3.5                   | 1.58                   | 0.5                                           |
| 12  | 10               | 0                     | 1.59                   | 0.24                                          |
| 13  | 10               | 1.71                  | 2.5                    | 0.5                                           |
| 14  | 10               | 0.67                  | 0                      | 0                                             |
| 15  | 20               | 1.81                  | 1.6                    | 0                                             |
| 16  | 17.6             | 0                     | 1.42                   | 0.25                                          |
| 17  | 18.55            | 3.17                  | 0.94                   | 0.26                                          |
| 18  | 10               | 3.5                   | 2.5                    | 0                                             |
| 19  | 18.55            | 3.5                   | 0                      | 0                                             |
| 20  | 20               | 3.5                   | 2.5                    | 0.26                                          |
| 21  | 20               | 0                     | 2.5                    | 0.5                                           |
| 22  | 10.16            | 3.5                   | 0.43                   | 0                                             |
| 23  | 10               | 0                     | 0                      | 0.5                                           |
| 24  | 20               | 1.81                  | 1.6                    | 0                                             |
| 25  | 15.15            | 0                     | 2.5                    | 0                                             |

**Table S2.** ANOVA results for the fitted multiple regression model.

| Standard deviation | 3.49   | R <sup>2</sup>           | 0.9182 |
|--------------------|--------|--------------------------|--------|
| Mean               | 13.12  | Adjusted R <sup>2</sup>  | 0.8597 |
| CV%                | 26.59  | Predicted R <sup>2</sup> | 0.7627 |
| Press              | 493.87 | Signal to noise ratio    | 12.855 |
